# Supplementary material
Source: ML conference proceedings conference paper supplement (https://openreview.net/forum?id=E94ID_k7CTA)
Supplement: supplementary_material [file attachment]

Train-1

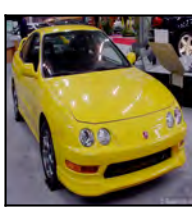

FP-1

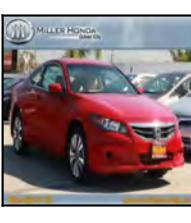

Train-1

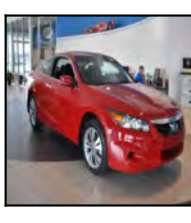

TN-1

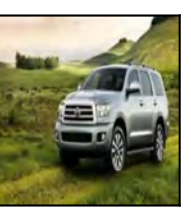

Train-1

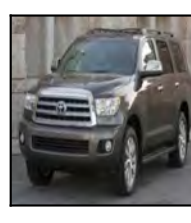

FN-1

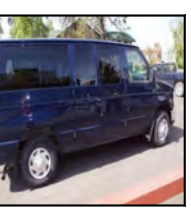

Train-1

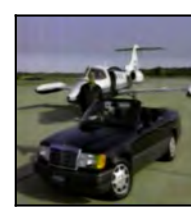

TP-1

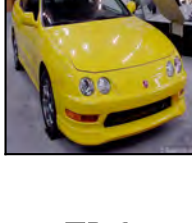

Train-2

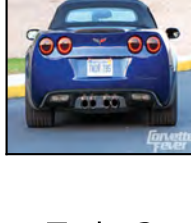

FP-1

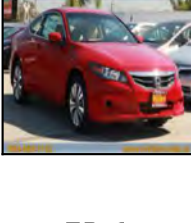

Train-2

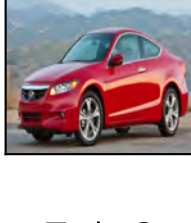

TN-1

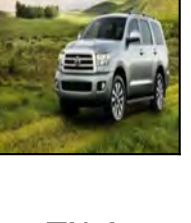

Train-2

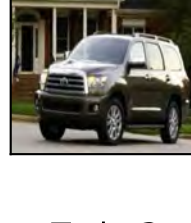

FN-1

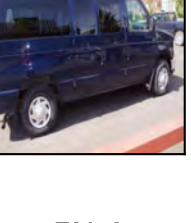

Train-2

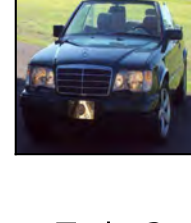

TP-1

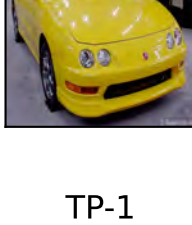

Train-3

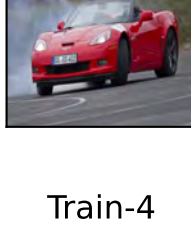

FP-1

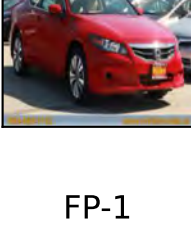

Train-3

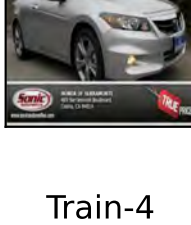

TN-1

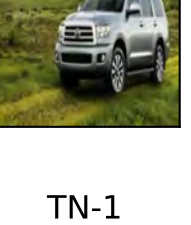

Train-3

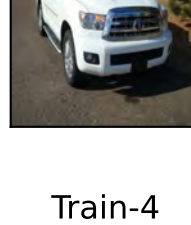

FN-1

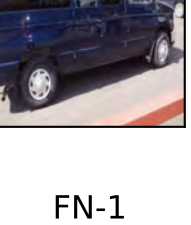

Train-3

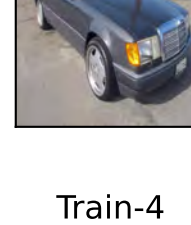

TP-1

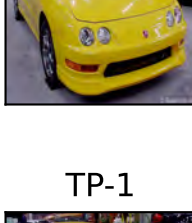

Train-4

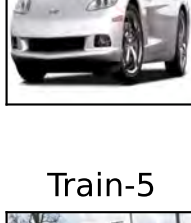

FP-1

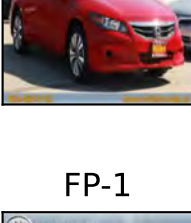

Train-4

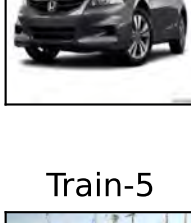

TN-1

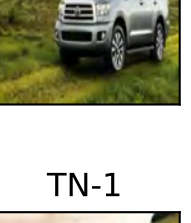

Train-4

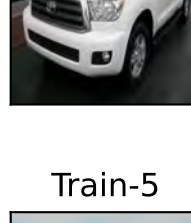

FN-1

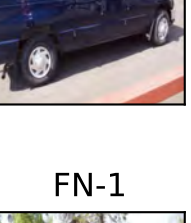

Train-4

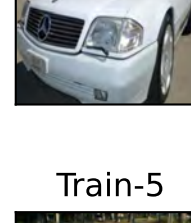

TP-1

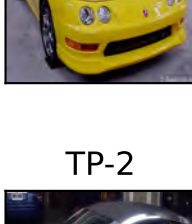

Train-5

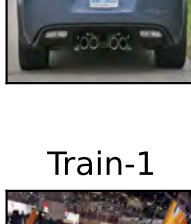

FP-1

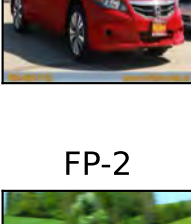

Train-5

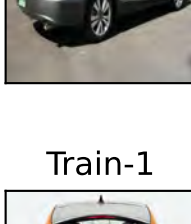

TN-1

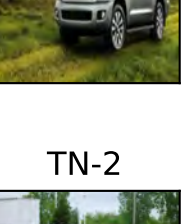

Train-5

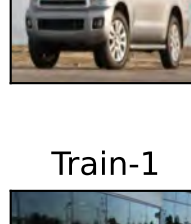

FN-1

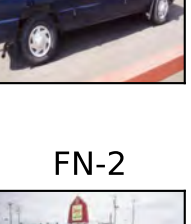

Train-5

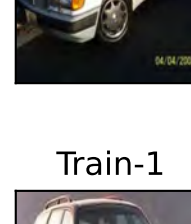

TP-2

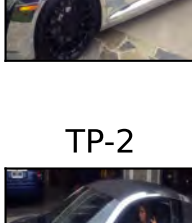

Train-1

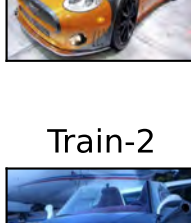

FP-2

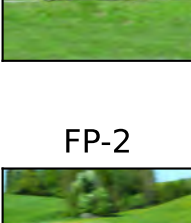

Train-1

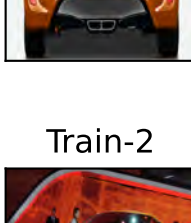

TN-2

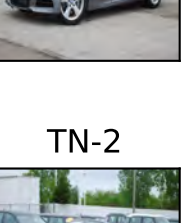

Train-1

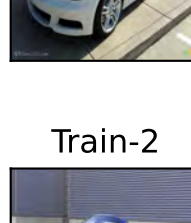

FN-2

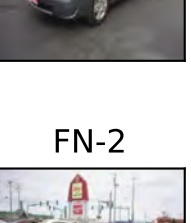

Train-1

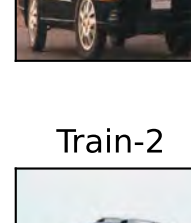

TP-2

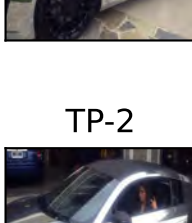

Train-2

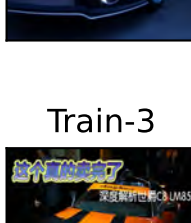

FP-2

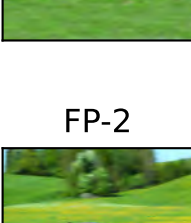

Train-2

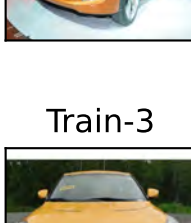

TN-2

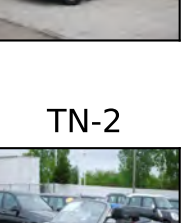

Train-2

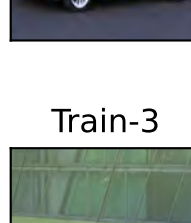

FN-2

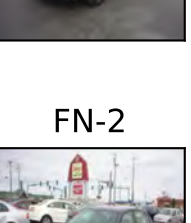

Train-2

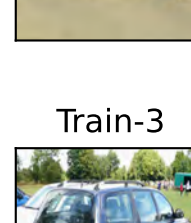

TP-2

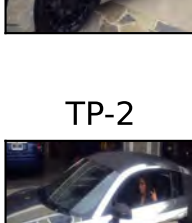

Train-3

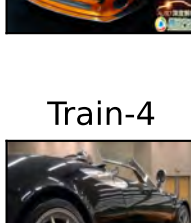

FP-2

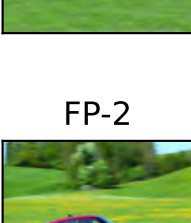

Train-3

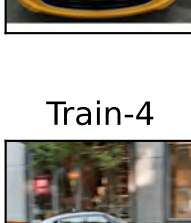

TN-2

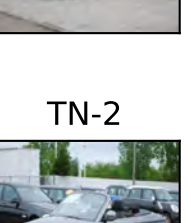

Train-3

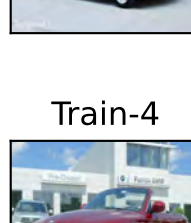

FN-2

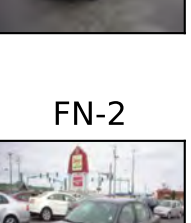

Train-3

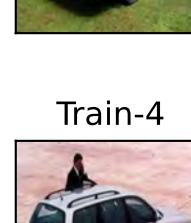

TP-2

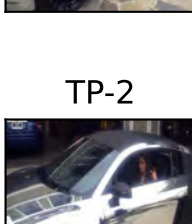

Train-4

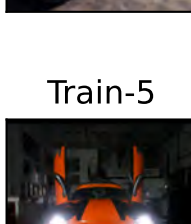

FP-2

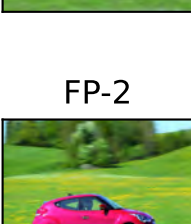

Train-4

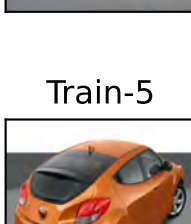

TN-2

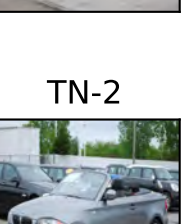

Train-4

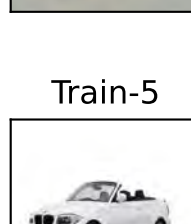

FN-2

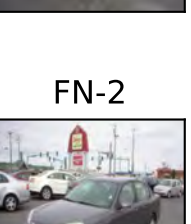

Train-4

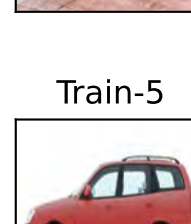

TP-2

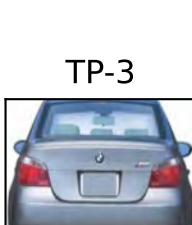

Train-5

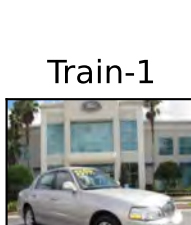

FP-2

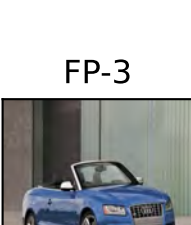

Train-5

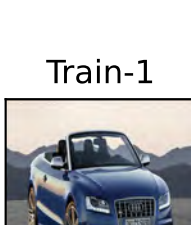

TN-2

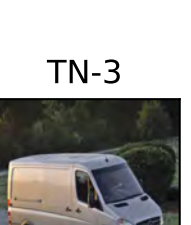

Train-5

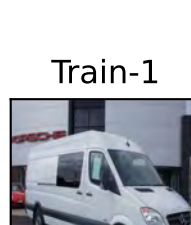

FN-2

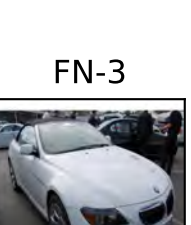

Train-5

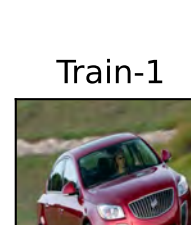

TP-3

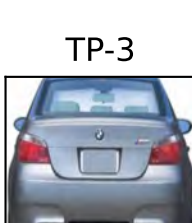

Train-1

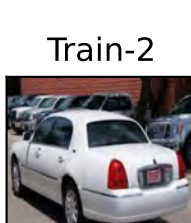

FP-3

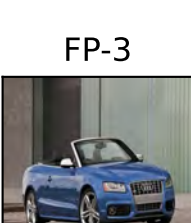

Train-1

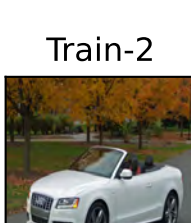

TN-3

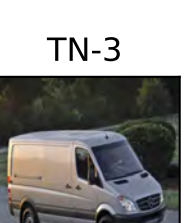

Train-1

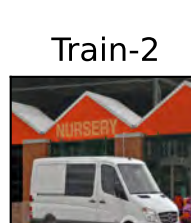

FN-3

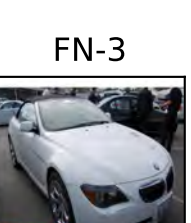

Train-1

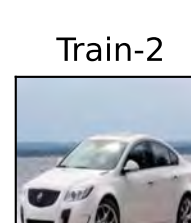

TP-3

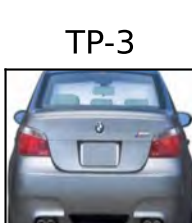

Train-2

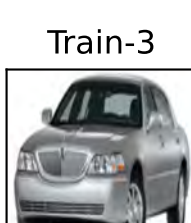

FP-3

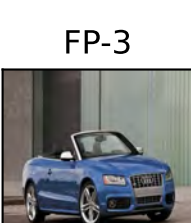

Train-2

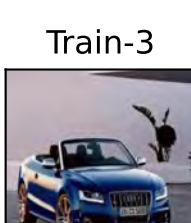

TN-3

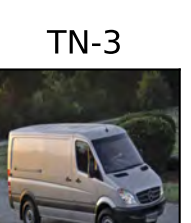

Train-2

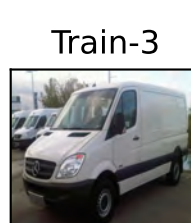

FN-3

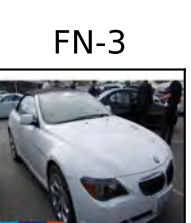

Train-2

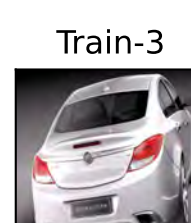

TP-3

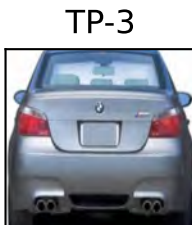

Train-3

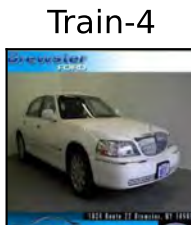

FP-3

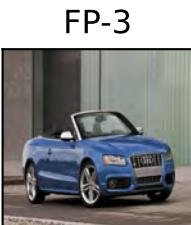

Train-3

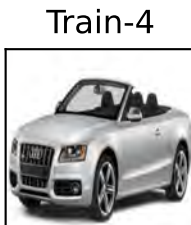

TN-3

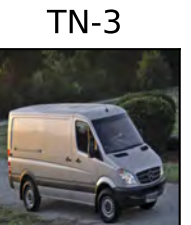

Train-3

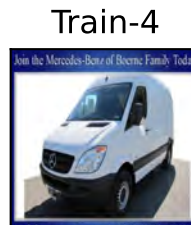

FN-3

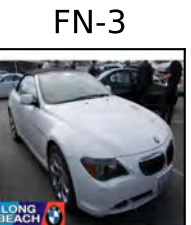

Train-3

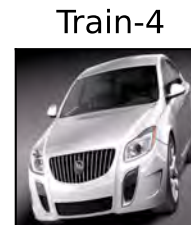

TP-3

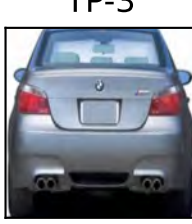

Train-4

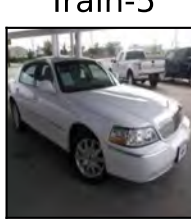

FP-3

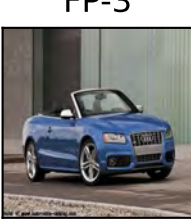

Train-4

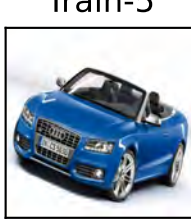

TN-3

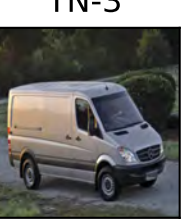

Train-4

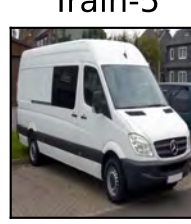

FN-3

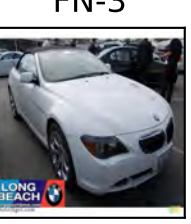

Train-4

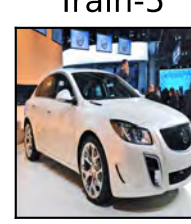

TP-3

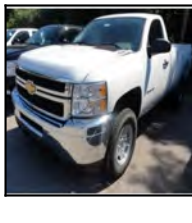

Train-5

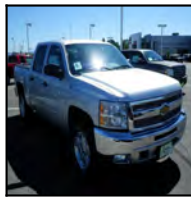

FP-3

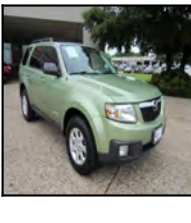

Train-5

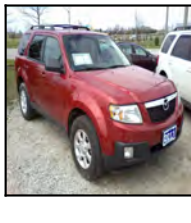

TN-3

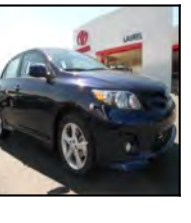

Train-5

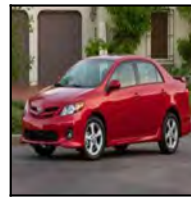

FN-3

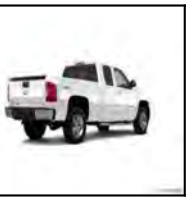

Train-5

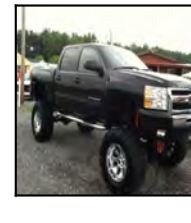

TP-4

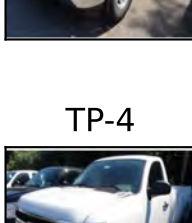

Train-1

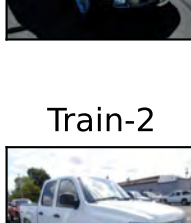

FP-4

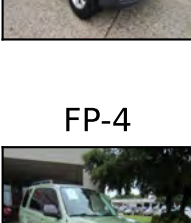

Train-1

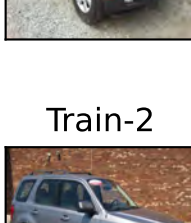

TN-4

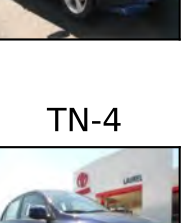

Train-1

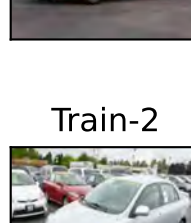

FN-4

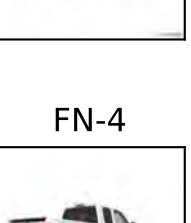

Train-1

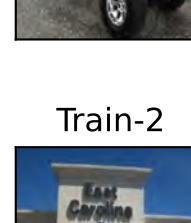

TP-4

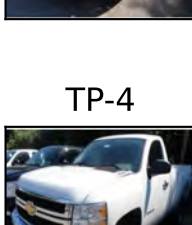

Train-2

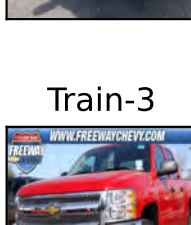

FP-4

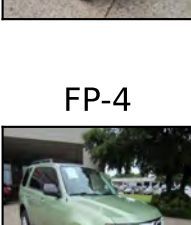

Train-2

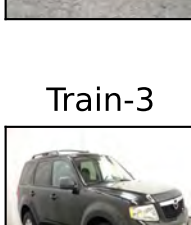

TN-4

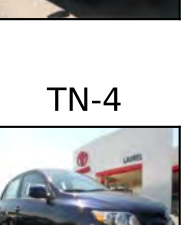

Train-2

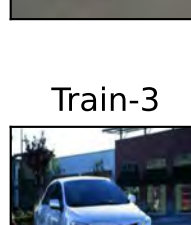

FN-4

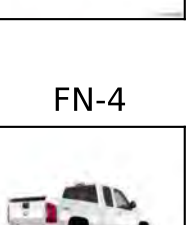

Train-2

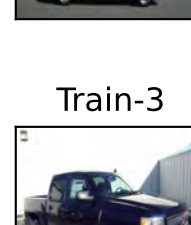

TP-4

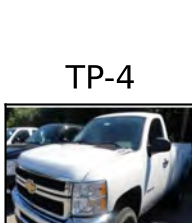

Train-3

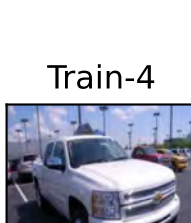

FP-4

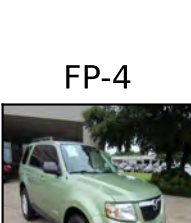

Train-3

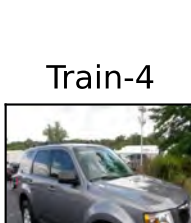

TN-4

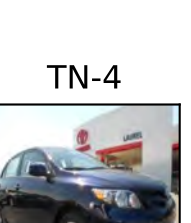

Train-3

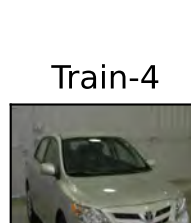

FN-4

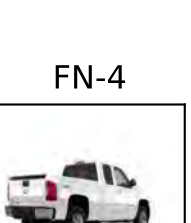

Train-3

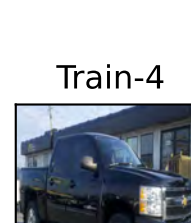

TP-4

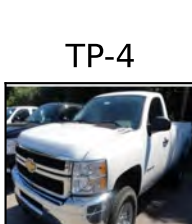

Train-4

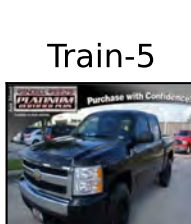

FP-4

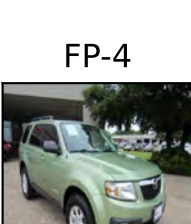

Train-4

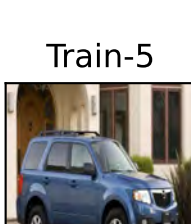

TN-4

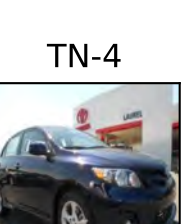

Train-4

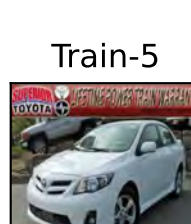

FN-4

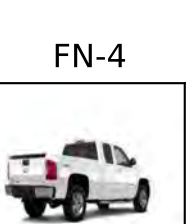

Train-4

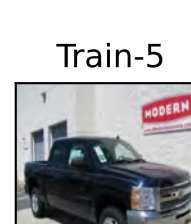

TP-4

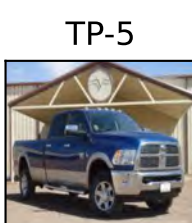

Train-5

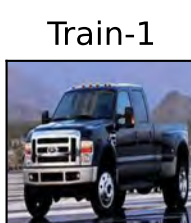

FP-4

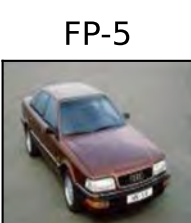

Train-5

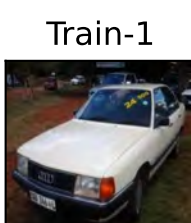

TN-4

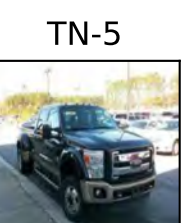

Train-5

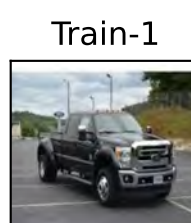

FN-4

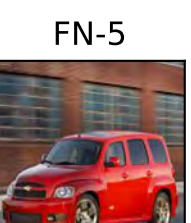

Train-5

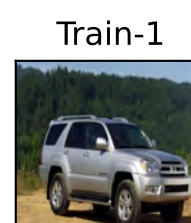

TP-5

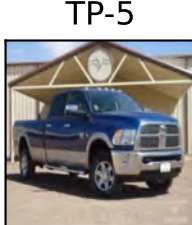

Train-1

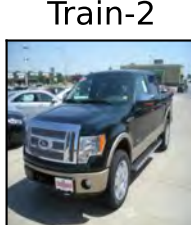

FP-5

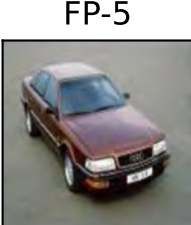

Train-1

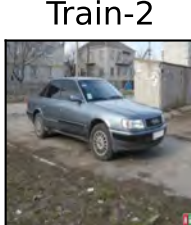

TN-5

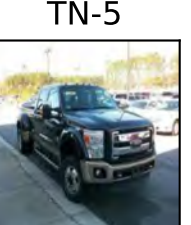

Train-1

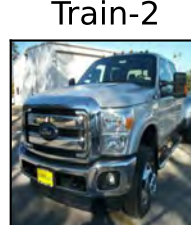

FN-5

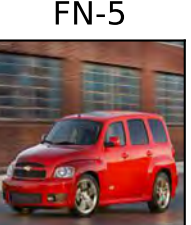

Train-1

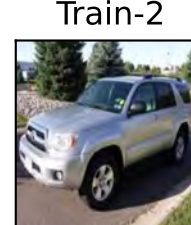

TP-5

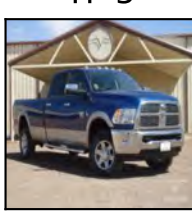

Train-2

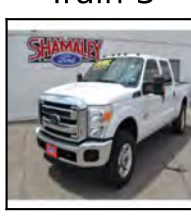

FP-5

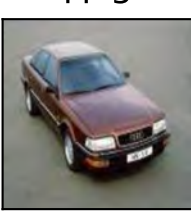

Train-2

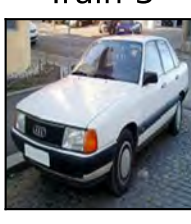

TN-5

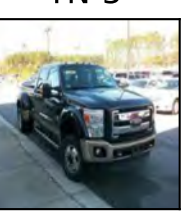

Train-2

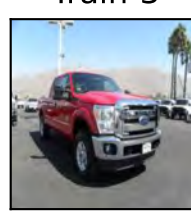

FN-5

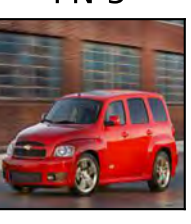

Train-2

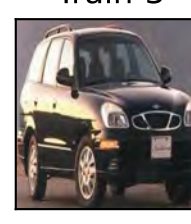

TP-5
